# Supplementary material for: Blackberry Leaves as New Functional Food? Screening Antioxidant, Anti-Inflammatory and Microbiological Activities in Correlation with Phytochemical Analysis
Source: MDPI journal article supplement (doi:10.3390/antiox10121945), 2021-12-04
Supplement: s1 [file s1]

Table S1. Validation parameters for standard detected at 270 nm

|                                                    | <u>Phenolic acids</u>           |                                 | quercetin                       | <u>Flavonols</u>                |                                 | hyperoside                      | <u>Flavon-3-ols</u><br>epicatechin |
|----------------------------------------------------|---------------------------------|---------------------------------|---------------------------------|---------------------------------|---------------------------------|---------------------------------|------------------------------------|
|                                                    | caffeic acid                    | ellagic acid                    |                                 | kaempferol                      | rutin                           |                                 |                                    |
| Linearity: $y = ax + b$                            |                                 |                                 |                                 |                                 |                                 |                                 |                                    |
| $a \pm S_a$                                        | 0.1418 $\pm$ 0.0051             | 0.1942 $\pm$ 0.0062             | 0.2005 $\pm$ 0.0135             | 0.2368 $\pm$ 0.0134             | 0.2463 $\pm$ 0.0148             | 0.0509 $\pm$ 0.0022             | 0.0512 $\pm$ 0.0028                |
| $b \pm S_b$                                        | insignificant ( $\alpha=0.05$ )    |
| Correlation coefficient ( $r$ )                    | 0.9999                          | 0.9999                          | 0.9995                          | 0.9996                          | 0.9996                          | 0.9998                          | 0.9996                             |
| Range of linearity [ $\mu\text{g/mL}$ ]            | 460.00 - 2300.00                | 240.0 - 1200.0                  | 260.00–1300.00                  | 200.00–1000.00                  | 220.0 - 1100.00                 | 200.00–1000.00                  | 240.00 - 1200.00                   |
| Limit of detection (LOD) [ $\mu\text{g/mL}$ ]      | 54.0708                         | 25.0042                         | 57.3062                         | 37.2537                         | 43.4250                         | 28.2275                         | 43.5613                            |
| Limit of quantification (LOQ) [ $\mu\text{g/mL}$ ] | 163.8508                        | 75.7702                         | 173.6552                        | 112.8899                        | 131.5909                        | 85.5378                         | 132.0040                           |

$S_a$  standard deviation of slope;  $S_b$  standard deviation of intercept,  $t$ , calculated values of Student's  $t$  test,  $t_{\alpha, f} = 2.228$  critical values of Student's test for degrees of freedom  $f = 10$  and significance level  $\alpha = 0.05$ .

Table S2. Validation parameters for standard detected at 360 nm

|                                                    | <u>Phenolic acids</u>           |                                 | quercetin                       | <u>Flavonols</u>                |                                 | hyperoside                      |
|----------------------------------------------------|---------------------------------|---------------------------------|---------------------------------|---------------------------------|---------------------------------|---------------------------------|
|                                                    | caffeic acid                    | ellagic acid                    |                                 | kaempferol                      | rutin                           |                                 |
| Linearity: $y = ax + b$                            |                                 |                                 |                                 |                                 |                                 |                                 |
| $a \pm S_a$                                        | 0.0674 $\pm$ 0.0031             | 0.0780 $\pm$ 0.0011             | 0.2877 $\pm$ 0.0117             | 0.2755 $\pm$ 0.0150             | 0.2711 $\pm$ 0.0172             | 0.0551 $\pm$ 0.0024             |
| $b \pm S_b$                                        | insignificant ( $\alpha=0.05$ ) |
| Correlation coefficient ( $r$ )                    | 0.9997                          | 0.99998                         | 0.9998                          | 0.9997                          | 0.9995                          | 0.9998                          |
| Range of linearity [ $\mu\text{g/mL}$ ]            | 460.0 - 2300.1                  | 240.0 - 1200.0                  | 260.00–1300.00                  | 200.00–1000.00                  | 220.0 - 1100.0                  | 200.00–1000.00                  |
| Limit of detection (LOD) [ $\mu\text{g/mL}$ ]      | 70.3544                         | 3.5426                          | 34.5431                         | 35.6583                         | 45.6525                         | 28.0352                         |
| Limit of quantification (LOQ) [ $\mu\text{g/mL}$ ] | 193.7049                        | 10.6279                         | 173.6552                        | 108.0553                        | 138.3408                        | 84.9552                         |

$S_a$  standard deviation of slope;  $S_b$  standard deviation of intercept,  $t$ , calculated values of Student's  $t$  test,  $t_{\alpha, f} = 2.228$  critical values of Student's test for degrees of freedom  $f = 10$  and significance level  $\alpha = 0.05$ .
